# Supplementary material for: Impacts of vacancy defects and element substitution on the electrical transport properties of θ -Al 2 Cu and : A NEGF-DFT study
Source: Royal Society of Chemistry journal article supplement (doi:10.1039/d5cp03665h), 2025-12-17
Supplement: d5cp03665h1.pdf [file d5cp03665h1.pdf]

# Supplementary Information

## Impact of vacancy defects and element substitution on the electrical transport properties of $\theta$ -Al<sub>2</sub>Cu and $\theta_c'$ -Al<sub>2</sub>Cu: A NEGF-DFT Study

Shumin Yan,<sup>1</sup> Mingyan Chen,<sup>2</sup> Yibin Hu,<sup>2</sup> and Yin Wang<sup>1,\*</sup>

<sup>1</sup> Department of Physics, Institute for Quantum Science and Technology, Shanghai University,  
200444, Shanghai, China.

<sup>2</sup> Hongzhiwei Technology (Shanghai) Company Ltd., 200120, Shanghai, China.

[\\*Corresponding author: yinwang@shu.edu.cn](mailto:yinwang@shu.edu.cn)

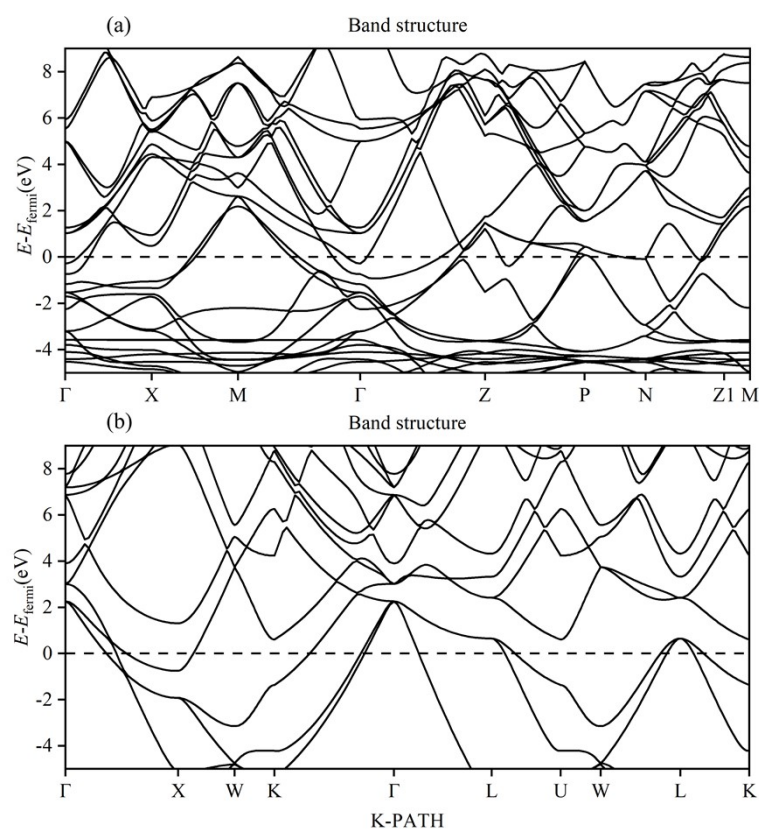

FIG. S1. Band structure diagrams of (a) bct and (b) fcc crystals.

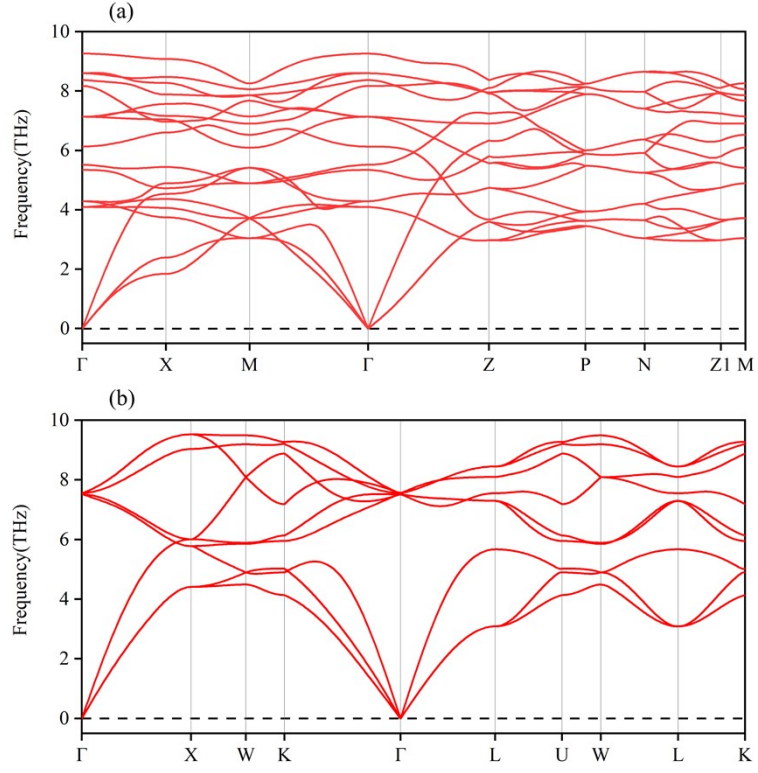

FIG. S2. Phonon spectra of (a) bct and (b) fcc crystals.

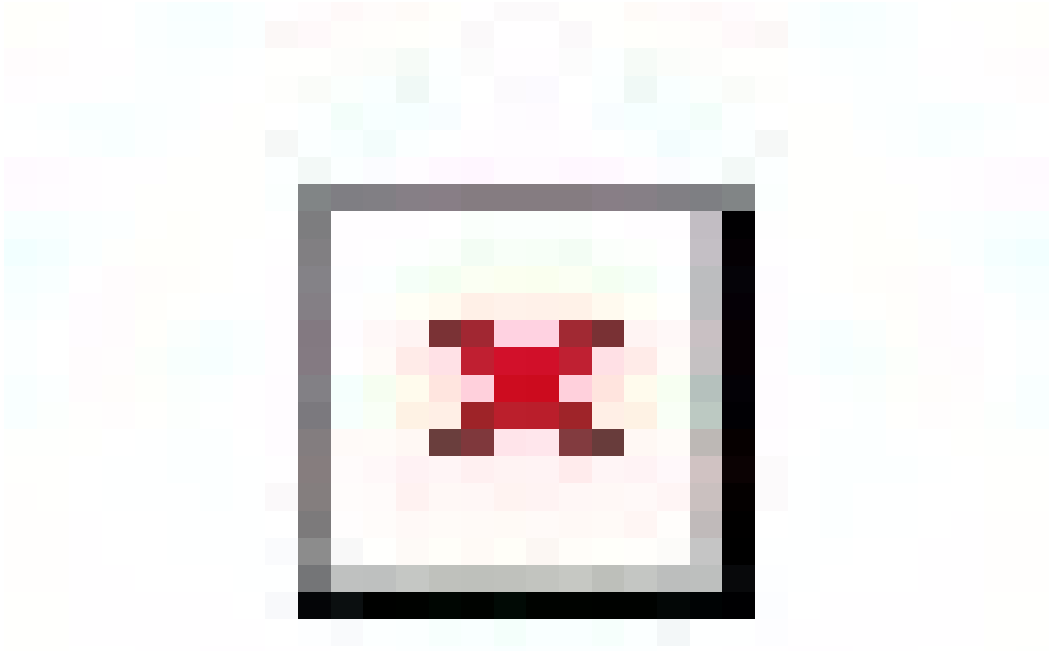

FIG. S3. The projection diagrams display the effective potential differences of the substitutional defect structures of the two systems along the real space transport direction.

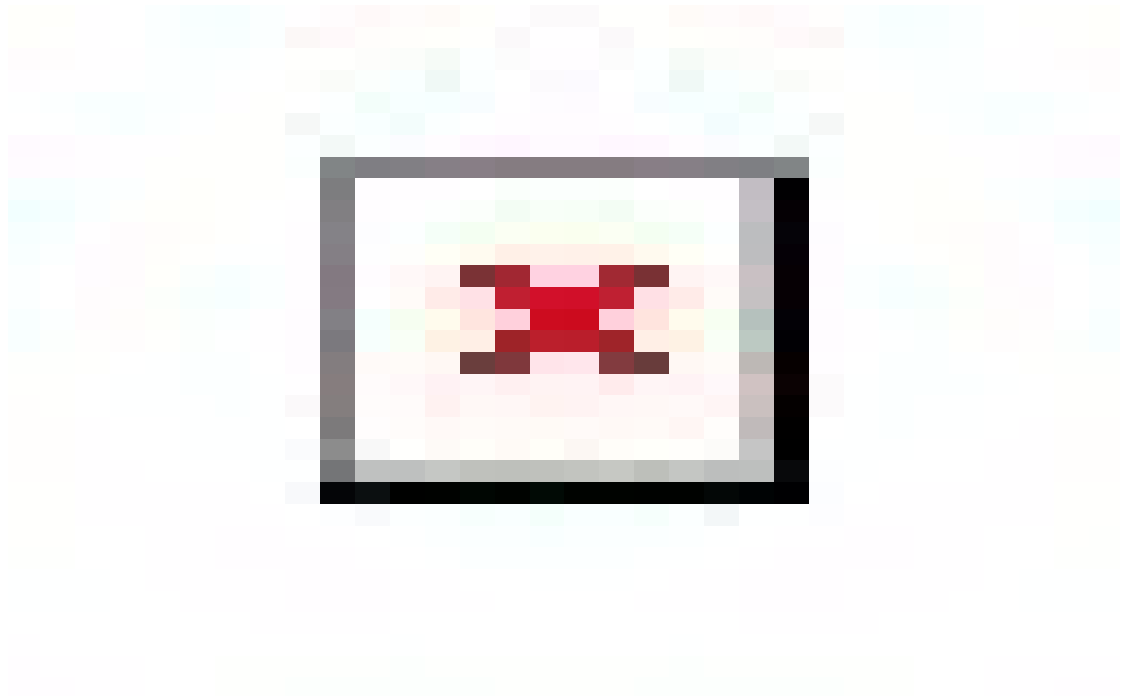

FIG. S4. Plots of the distribution of the difference in the local density of states along the transport direction  $z$  for the perfect and vacancy systems. Panels (a) and (b) correspond to the bct-Systems, while panels (c) and (d) represent the fcc-Systems. The black dotted line is the Fermi level.

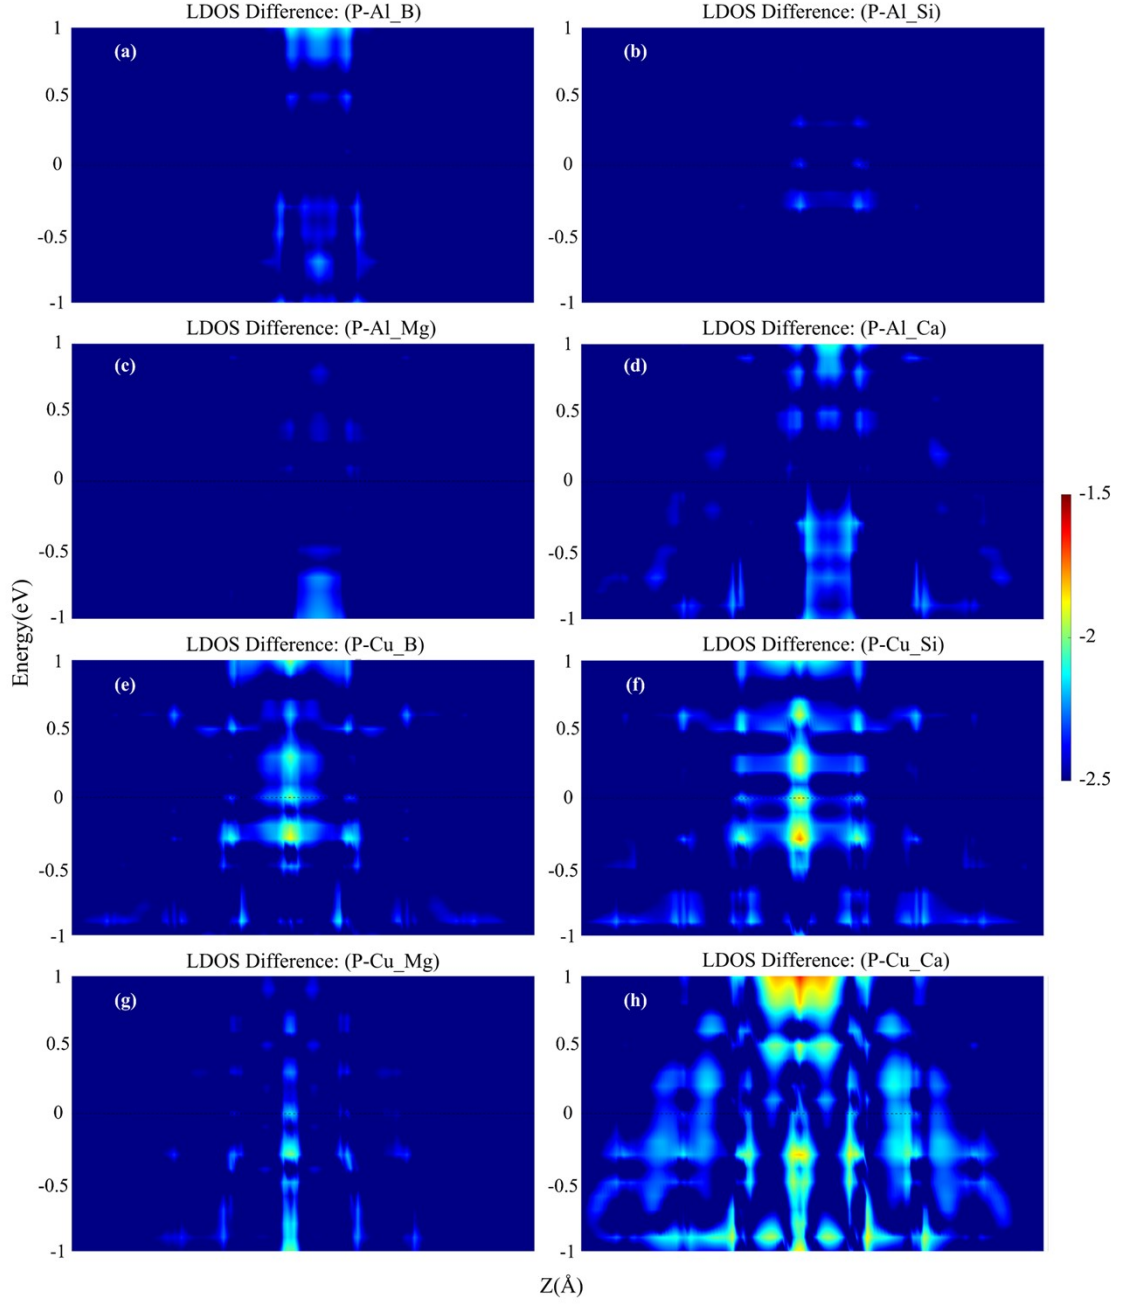

FIG. S5. The distribution of the difference in LDOS between the perfect system and the substitutional defect systems in bct-Systems along the transport direction  $z$  is shown, where (a)-(d) are the difference plots between the perfect system and the Al\_X systems, and (e)-(h) are the difference plots between the perfect system and the Cu\_X systems.

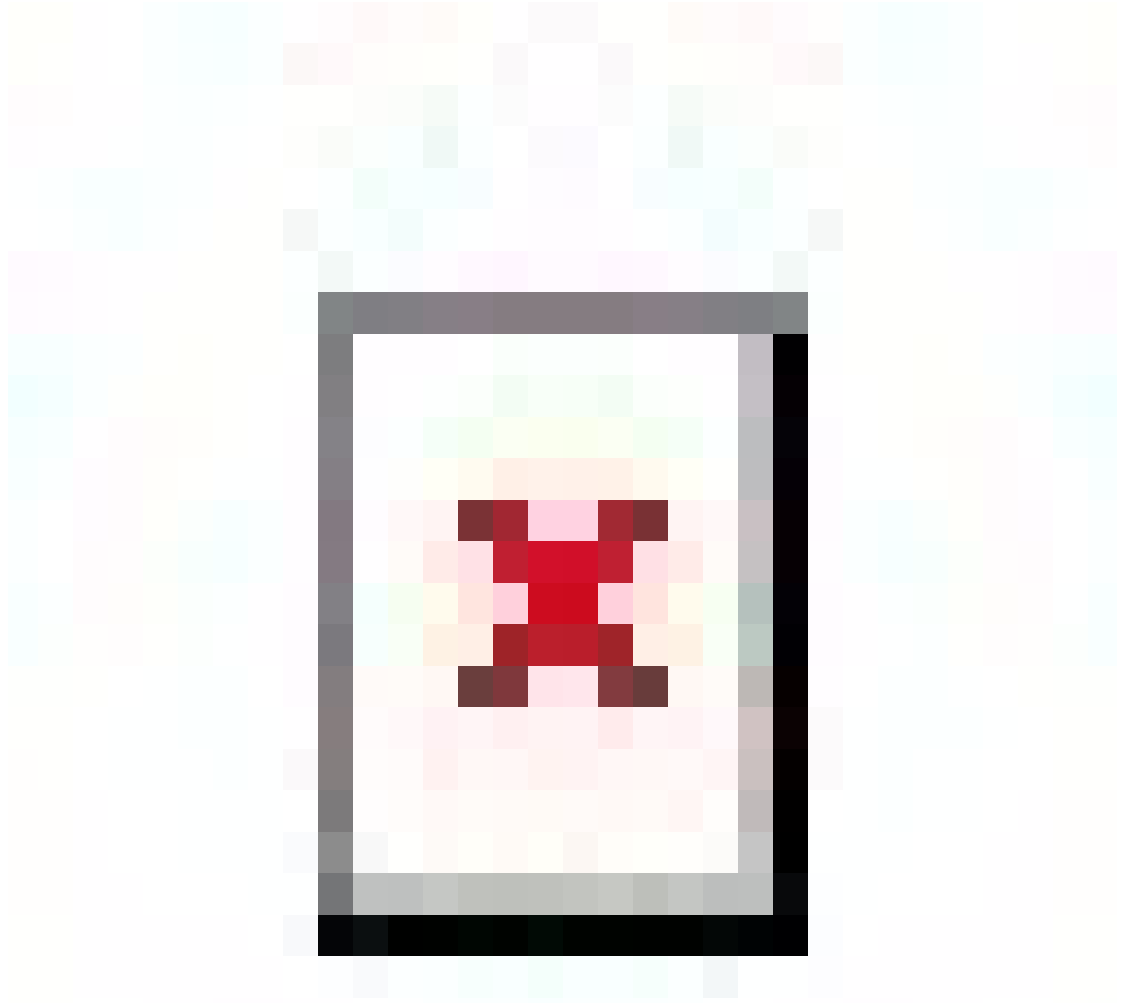

FIG. S6. The distribution of the difference in LDOS between the perfect system and the substitutional defect systems in fcc-Systems along the transport direction  $z$  is shown, where (a)-(d) are the difference plots between the perfect system and the Al\_X systems, and (e)-(h) are the difference plots between the perfect system and the Cu\_X systems.
